# Supplementary material for: First-in-human studies of seletalisib, an orally bioavailable small-molecule PI3Kδ inhibitor for the treatment of immune and inflammatory diseases
Source: Springer Nature journal article supplement (doi:10.1007/s00228-017-2205-7), 2017-02-03

**C**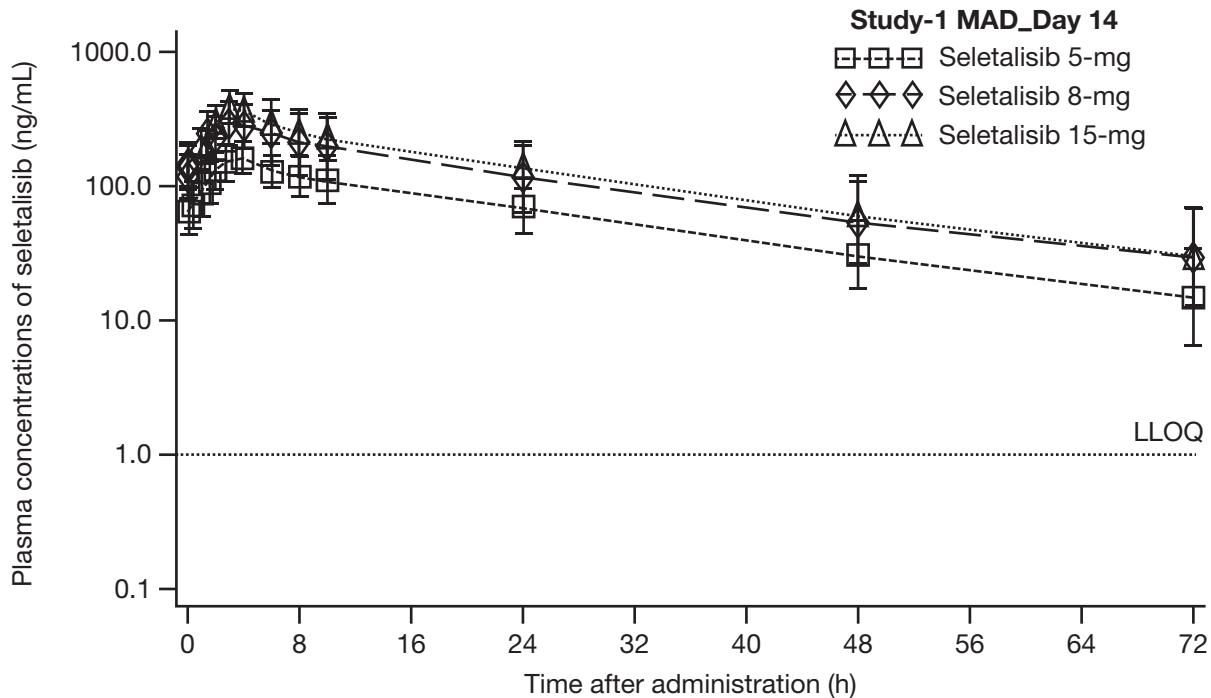

Supplement: 228_2017_2205_MOESM8_ESM.pdf [file 228_2017_2205_MOESM8_ESM.pdf]
